# Supplementary material for: N-dots as a photoluminescent probe for the rapid and selective detection of Hg2+and Ag+in aqueous solution
Source: Royal Society of Chemistry journal article supplement (doi:10.1039/c5tb02628h), 2016-01-01

**Supporting information:**

N-dots as photoluminescent probe for rapid and selective detection  
of Hg<sup>2+</sup> and Ag<sup>+</sup> in aqueous solution.

Zhisheng Wu, Mengke Feng, Xiuxian Chen and Xinjing Tang\*

State Key Laboratory of Natural and Biomimetic Drugs, the School of Pharmaceutical Sciences,  
Peking University, Beijing 100191, China.

\* Email: [xinjingt@bjmu.edu.cn](mailto:xinjingt@bjmu.edu.cn); Fax: 8610-82805635.

## Materials and Apparatus

All chemicals were obtained from commercial suppliers and were used without further purification. The probe stock solutions were prepared in distilled water at a concentration of 2 mg mL<sup>-1</sup>. The stock solutions of various testing species were prepared from CdCl<sub>2</sub>, CrCl<sub>3</sub>, MgCl<sub>2</sub>, CaCl<sub>2</sub>, FeCl<sub>3</sub> 6H<sub>2</sub>O, NaCl, CoCl<sub>2</sub> 6H<sub>2</sub>O, KCl, Hg(ClO<sub>4</sub>)<sub>2</sub> 3H<sub>2</sub>O, AgNO<sub>3</sub> at 10 mM in distilled water. PBS buffer was prepared using distilled water. Infrared spectra were obtained on a NEXUS-470 Fourier transform infrared (FTIR) spectrometer ranged from 4000 to 500 cm<sup>-1</sup>. The measurement of C, H, and N elements was performed on Varo EL III elemental analyser. Atomic force microscope (AFM) image was recorded on a Bruker Multimode 8 atomic force microscope. The fluorescence (FL) spectra were measured on a fluorimeter (Cary Eclipse) equipped with an integrating sphere.

## Synthesis of N-dots

Raw N-dots were prepared by heating 2-azidoimidazole (0.2g) in methanol (5 mL) at 50 °C for 60 hours. After cooling, methanol was removed under reduced pressure. The obtained residue was washed with ethyl acetate for 5 times. The supernatant was discarded and the obtained solid was dispersed in water (5 mL). After filtration with 0.22 µm filter, the solution was concentrated and vacuum-frozen-dried, yielding 22.3 mg solid, 11 % yield.

## Photoluminescence measurement

All the fluorescence measurements were performed at room temperature using PBS buffer (pH 7.4) solution. In a typical assay, 10 µL N-dots stock solution (2 mg/mL) was diluted in PBS buffer at a final concentration of 20 µg/mL for photoluminescence spectra. For cation selectivity study, photoluminescence emission spectra were recorded after mixing with various metal ions (Cd<sup>2+</sup>, Cr<sup>3+</sup>, Mg<sup>2+</sup>, Ca<sup>2+</sup>, Fe<sup>3+</sup>, Na<sup>+</sup>, Co<sup>2+</sup>, K<sup>+</sup>, Hg<sup>2+</sup>, Ag<sup>+</sup>). In kinetic studies, photoluminescence intensity at 515 nm (excitation at 460 nm) against time was monitored in the presence and the absence of analytes (Hg<sup>2+</sup> or Ag<sup>+</sup>) every 10 seconds. In sensitivity studies, different concentrations of Hg<sup>2+</sup> or Ag<sup>+</sup> (final concentration: 0~100 µM) were added to N-dots solutions (20

μg/mL), followed by photoluminescence measurement. To distinguish Hg<sup>2+</sup> from Ag<sup>+</sup>, EDTA (30 μM) was added to N-dots-Hg or N-dots-Ag aqueous solutions and mix well for 1 min, followed by photoluminescence spectral measurement. In competitive binding experiments with biothiols, Cys, Hcy, GSH and Na<sub>2</sub>S at a final concentration 1 mM were added into Hg-N-dots or Ag-N-dots solutions, and the resulting solutions were shaken well and incubated for 1 min, followed by photoluminescence measurement.

### **Limit of detection (LOD) and Stern-Volmer quenching constant:**

The detection limit was calculated using equation: LOD=3σ/K. (σ is the standard deviation of the control N-dots solutions, K is the slop of obtained linear curve in Fig. 3).

The quenching was also described by a modified Stern-Volmer equation:

$$F_0/(F_0-F) = 1/(f_a K_a [Q]) + 1/f_a$$

Where Q is the concentration of the quencher (Hg<sup>2+</sup> or Ag<sup>+</sup>), F<sub>0</sub> is the photoluminescence intensity in the absence of the quencher, F is the observed intensity in the presence of the quencher, f<sub>a</sub> is the fraction of initial photoluminescence that is accessible to the quencher and K<sub>a</sub> is the Stern–Volmer quenching constant.

### **Quantum Yield**

The quantum yield measurements were determined in PBS buffer using quinine sulfate (0.10 M H<sub>2</sub>SO<sub>4</sub>, Φ = 0.54) as a standard according to the following equation:

$$\Phi_u = \Phi_s (Y_u/Y_s)(A_s/A_u)(n_u/n_s)$$

Φ is quantum yield; Y is the measured integrated fluorescence emission intensity; A is the optical density measured at the excitation wavelength; n is the refractive index. The subscript “s” refers to the standard quantum yield of reference quinine sulfate. The subscript “u” refers to the unknown quantum yield of as-prepared N-dots. In order to minimize re-absorption effects, absorbance in the 1cm fluorescence cuvette were kept under 0.05 at the excitation wavelength.

**Table S1.** Elemental composition percentage of N-dots prepared at 50 °C.

| Elemental analysis | Composition percentage (%) |
|--------------------|----------------------------|
| C                  | 36.47                      |
| H                  | 5.14                       |
| N                  | 36.27                      |

**Fig. S1** Fluorescence images (top) and digital images (bottom) of reaction solutions after heating different time at 50 °C.

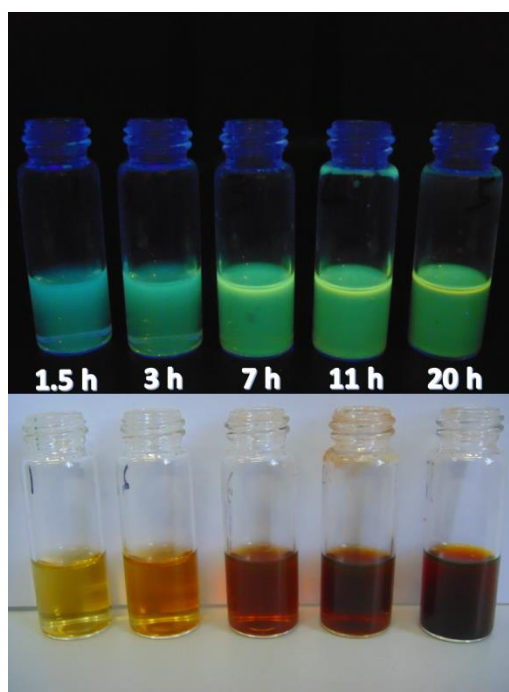

**Fig. S2** Atomic force microscopy (AFM) image and size profile of as-prepared N-dots.

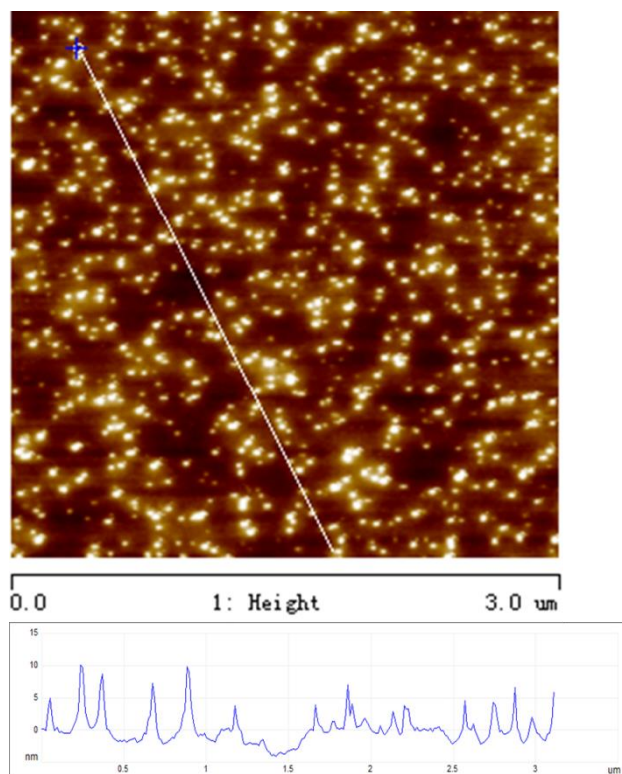

**Fig. S3** FTIR spectra of N-dots prepared at 50 °C.

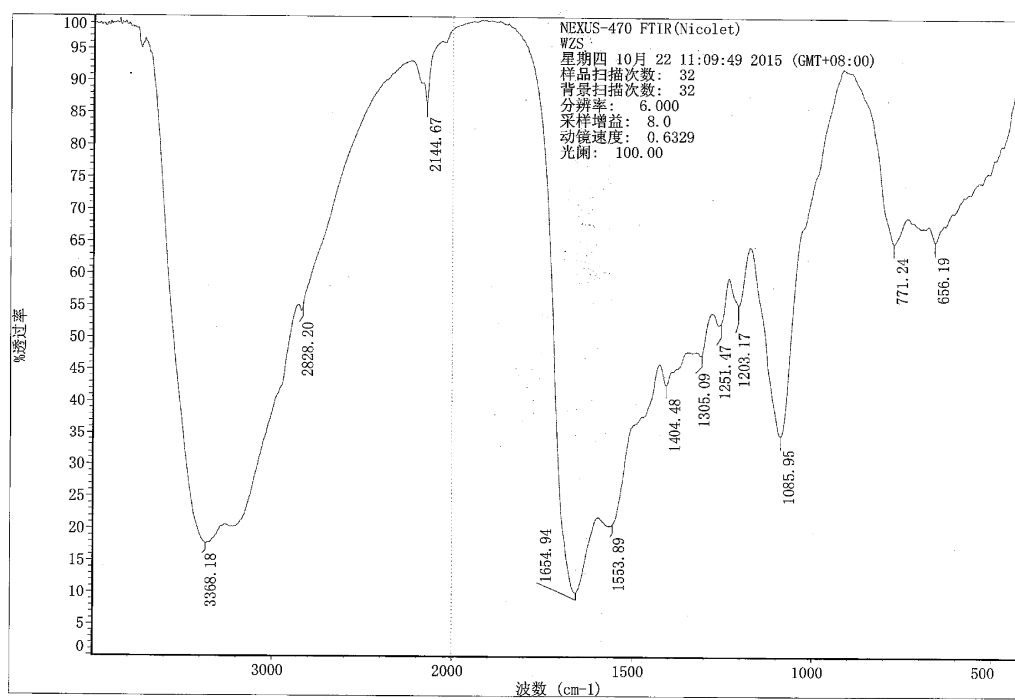

**Fig. S4** Time-dependent photoluminescence intensity (515 nm) change upon the addition of analytes (100  $\mu\text{M}$ ) to N-dots solutions (20  $\mu\text{g mL}^{-1}$ ).  $F_0$  is the initial intensity.  $\lambda_{\text{ex}} = 460 \text{ nm}$ .

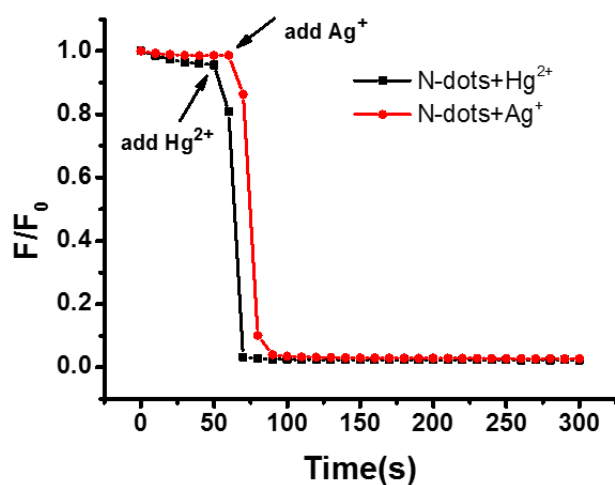

**Fig. S5** A linear plot of  $F_0/(F_0-F)$  versus  $1/[\text{Hg}^{2+}]$  and  $1/[\text{Ag}^+]$ .

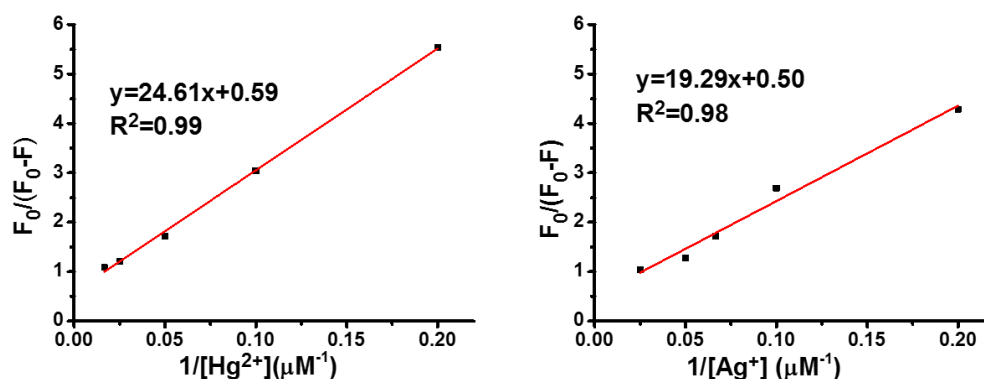

**Fig. S6** Photoluminescence emission of N-dots in the presence of analytes (100  $\mu\text{M}$ ), followed by the addition of biothiols (1 mM) in 20 mM PBS buffer (pH=7.4).  $\lambda_{\text{ex}} = 460 \text{ nm}$ .

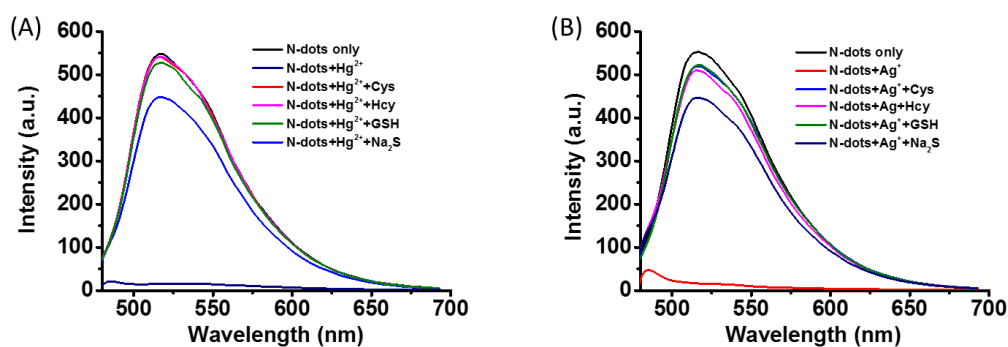

Supplement: c5tb02628h1.pdf [file c5tb02628h1.pdf]
